# Supplementary material
Source: PubMed Central journal article supplement (PMC6897926)

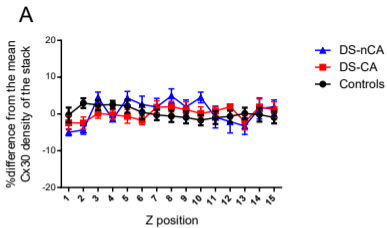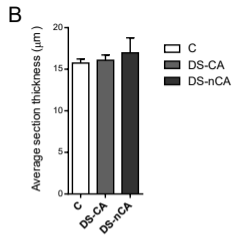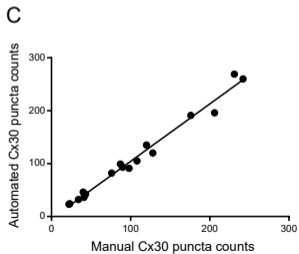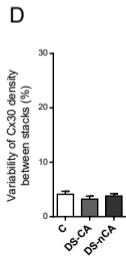

0 0.2 $\mu$ m 0.4 $\mu$ m 0.6 $\mu$ m 0.8 $\mu$ m 1.0 $\mu$ m 1.2 $\mu$ m 1.4 $\mu$ m 1.6 $\mu$ m

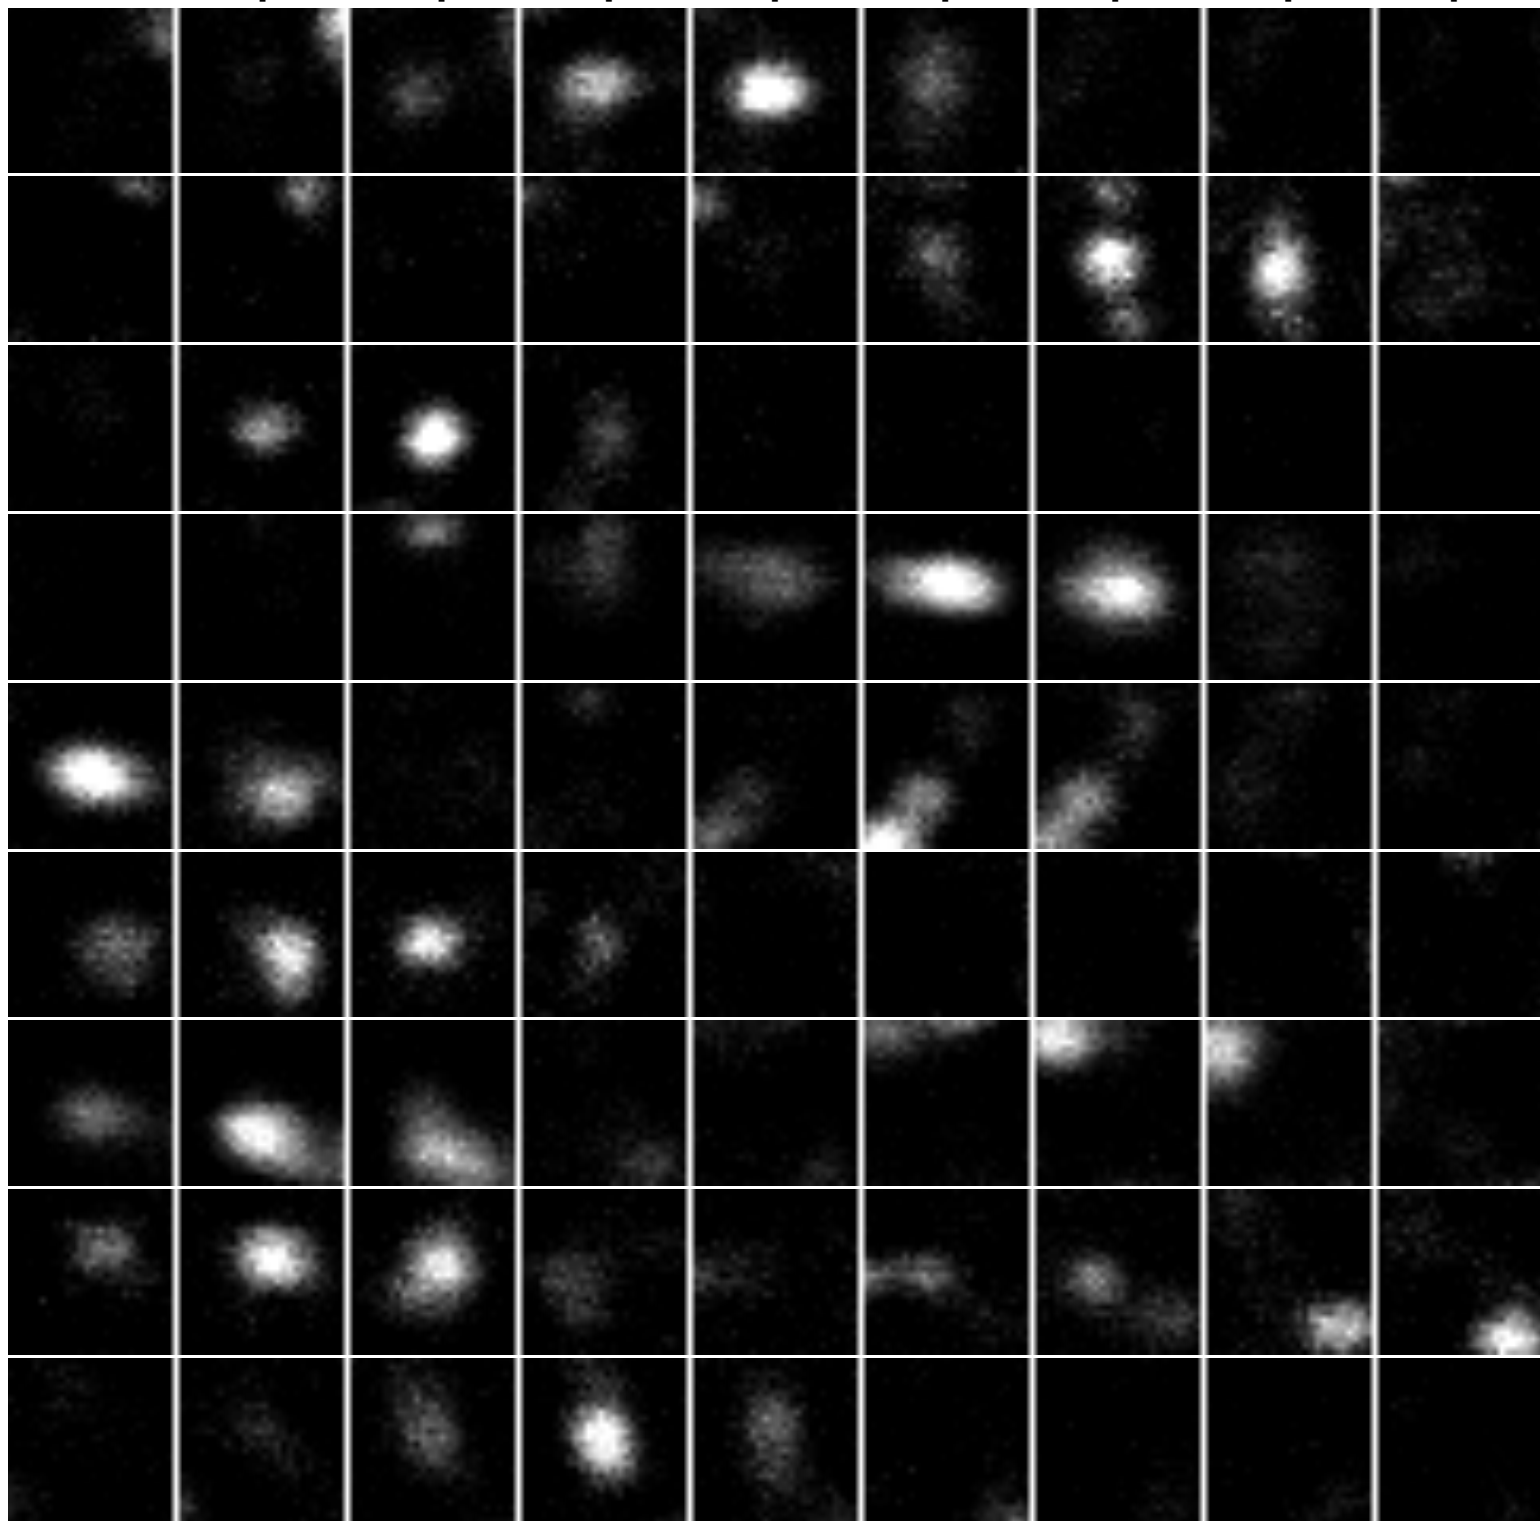

Cell 1

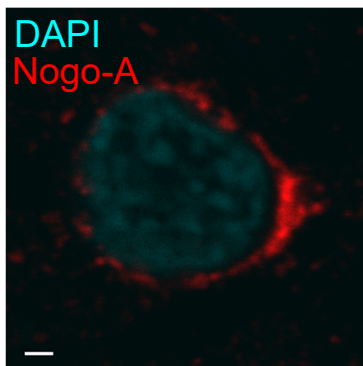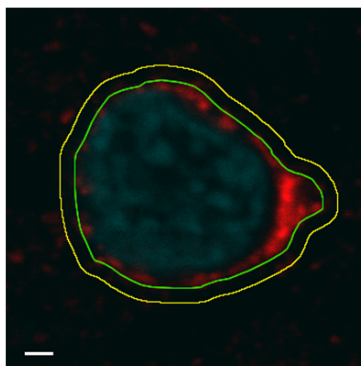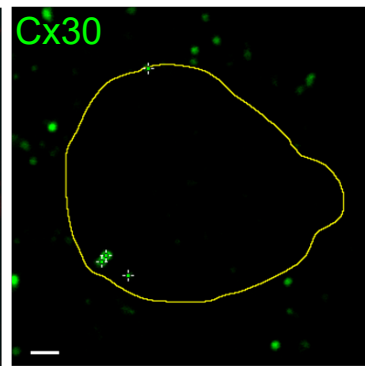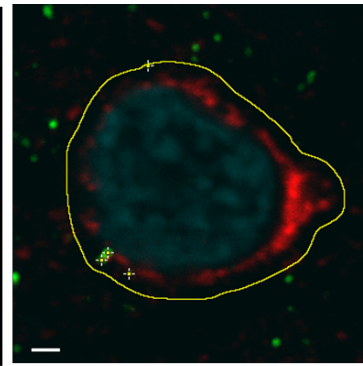

Cell 2

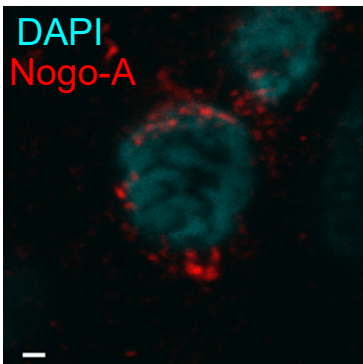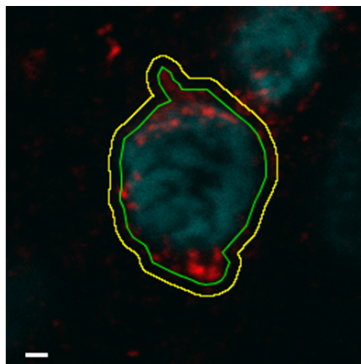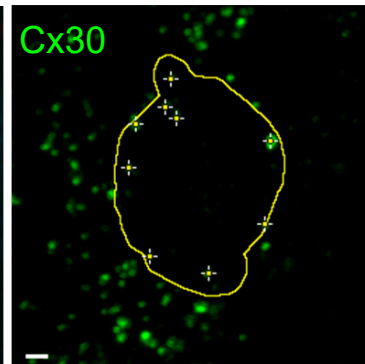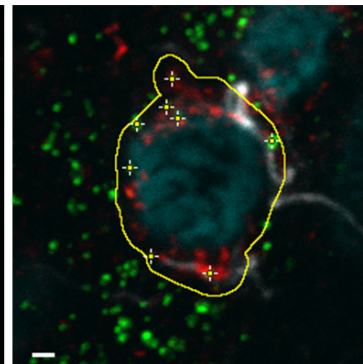

Cell 3

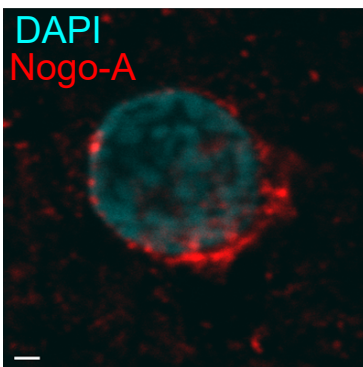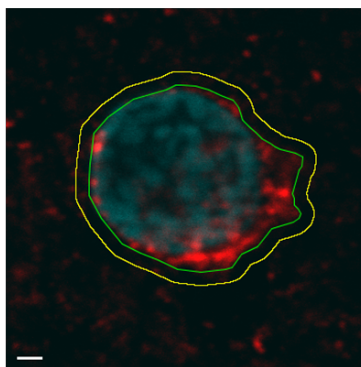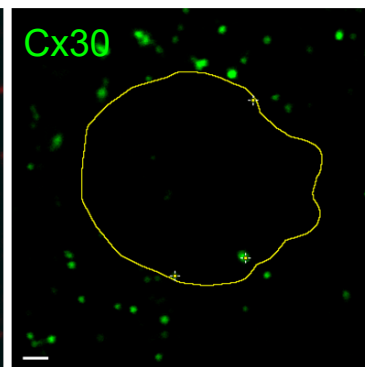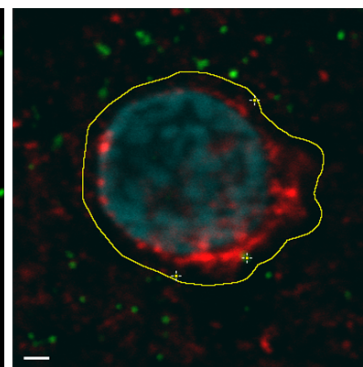

Fiber 1

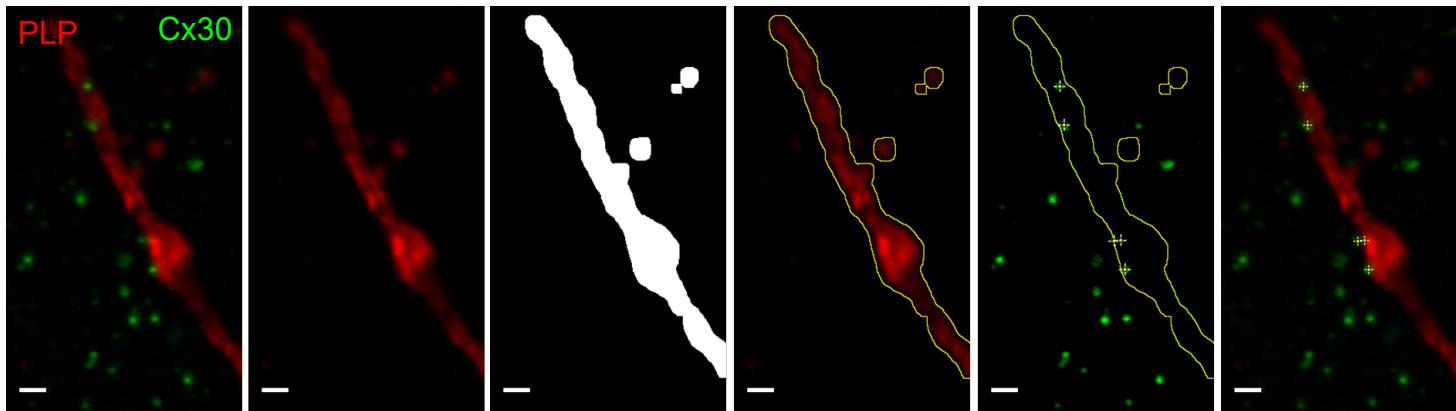

Fiber 2

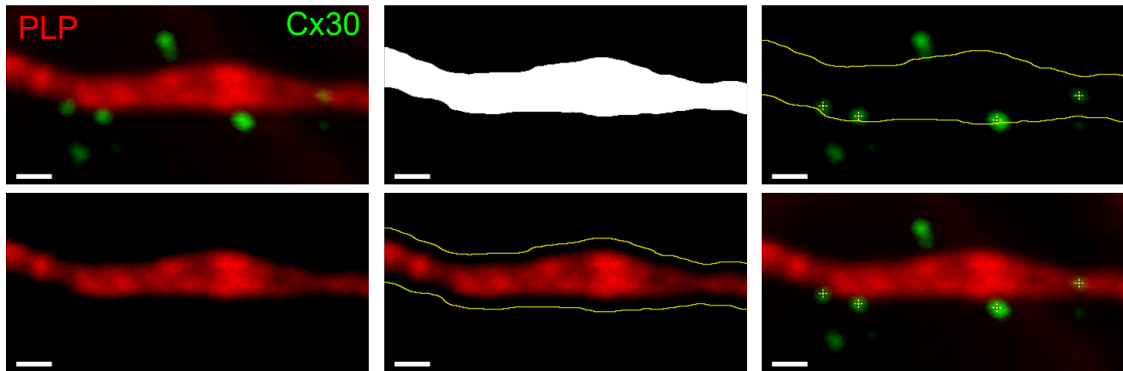

Blood vessel 1

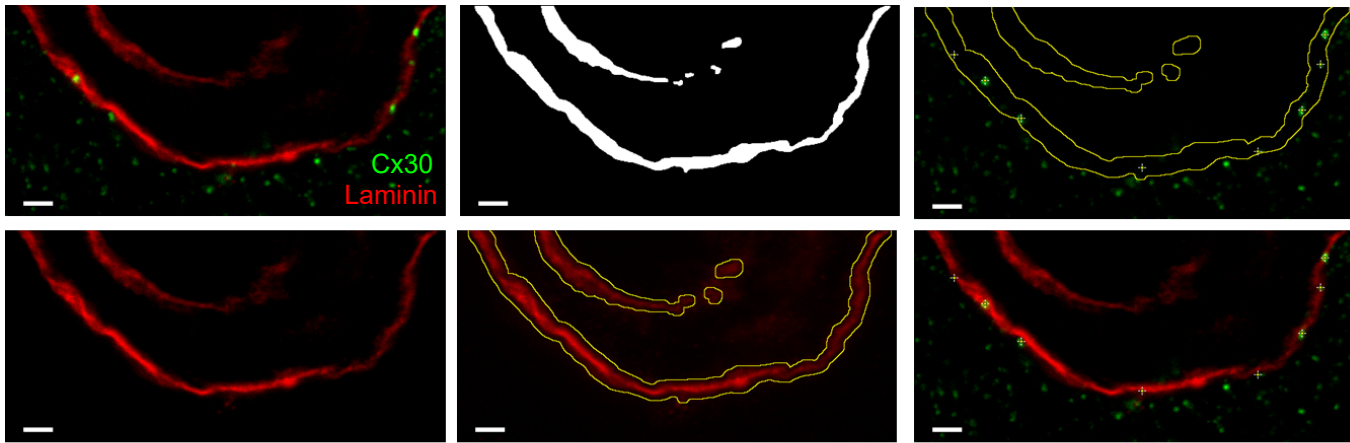

Blood vessel 2

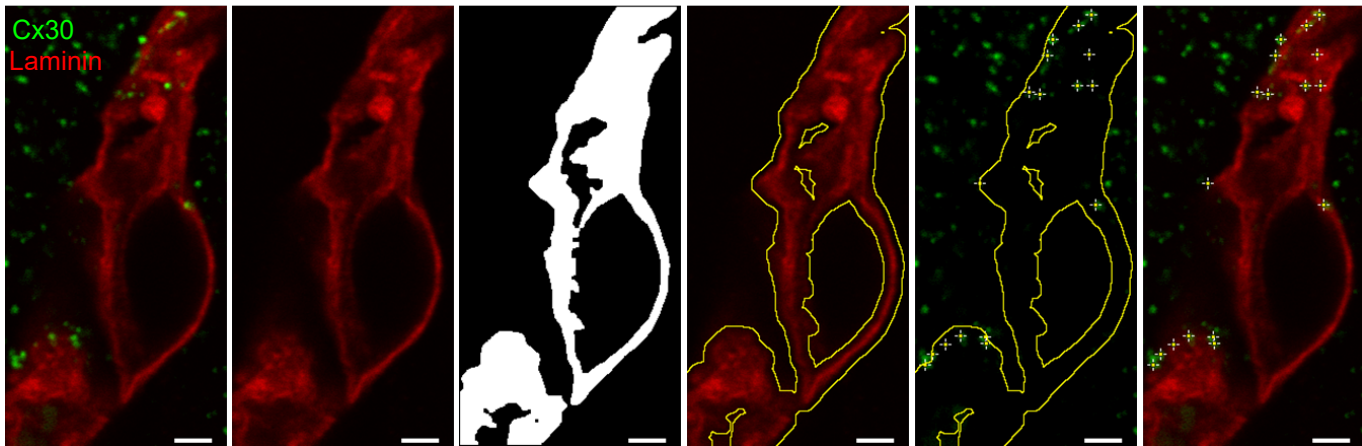

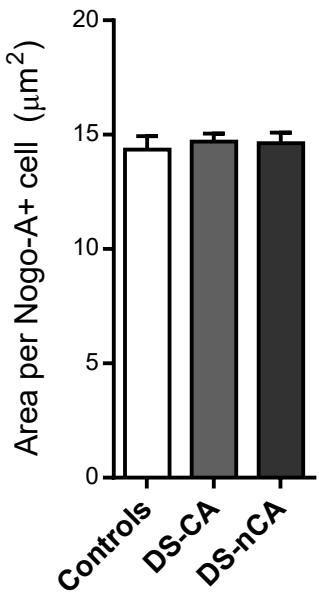

**A****Bootstrap resampling of Nogo-A+ cells: Cx30 puncta mapping to Nogo-A+ cells  
Controls vs Depressed Suicides**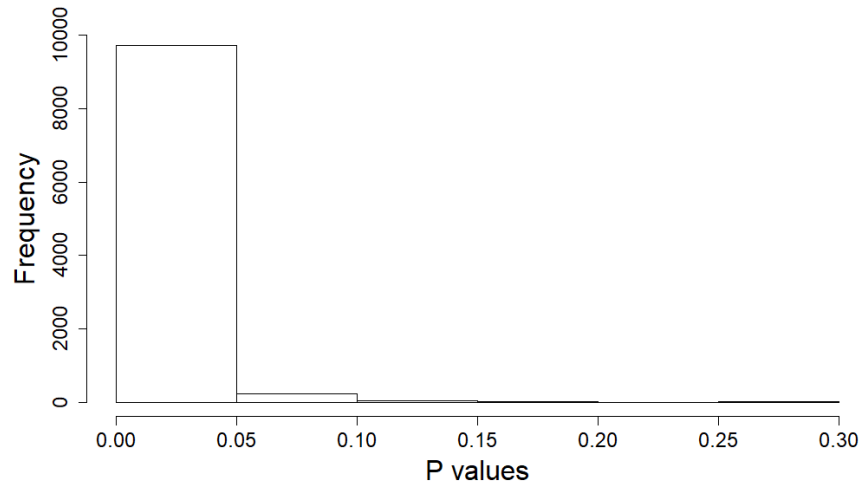**B****Bootstrap resampling of image stacks: Cx30 puncta mapping to PLP+ fibers  
Controls vs Depressed Suicides**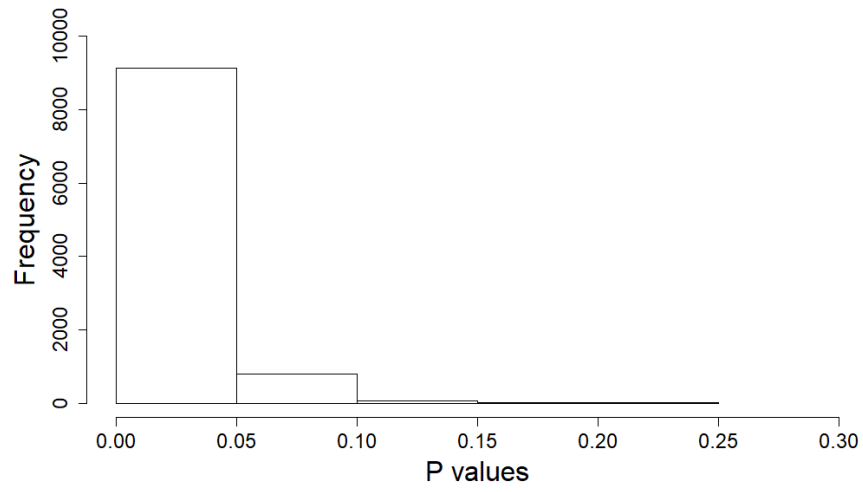

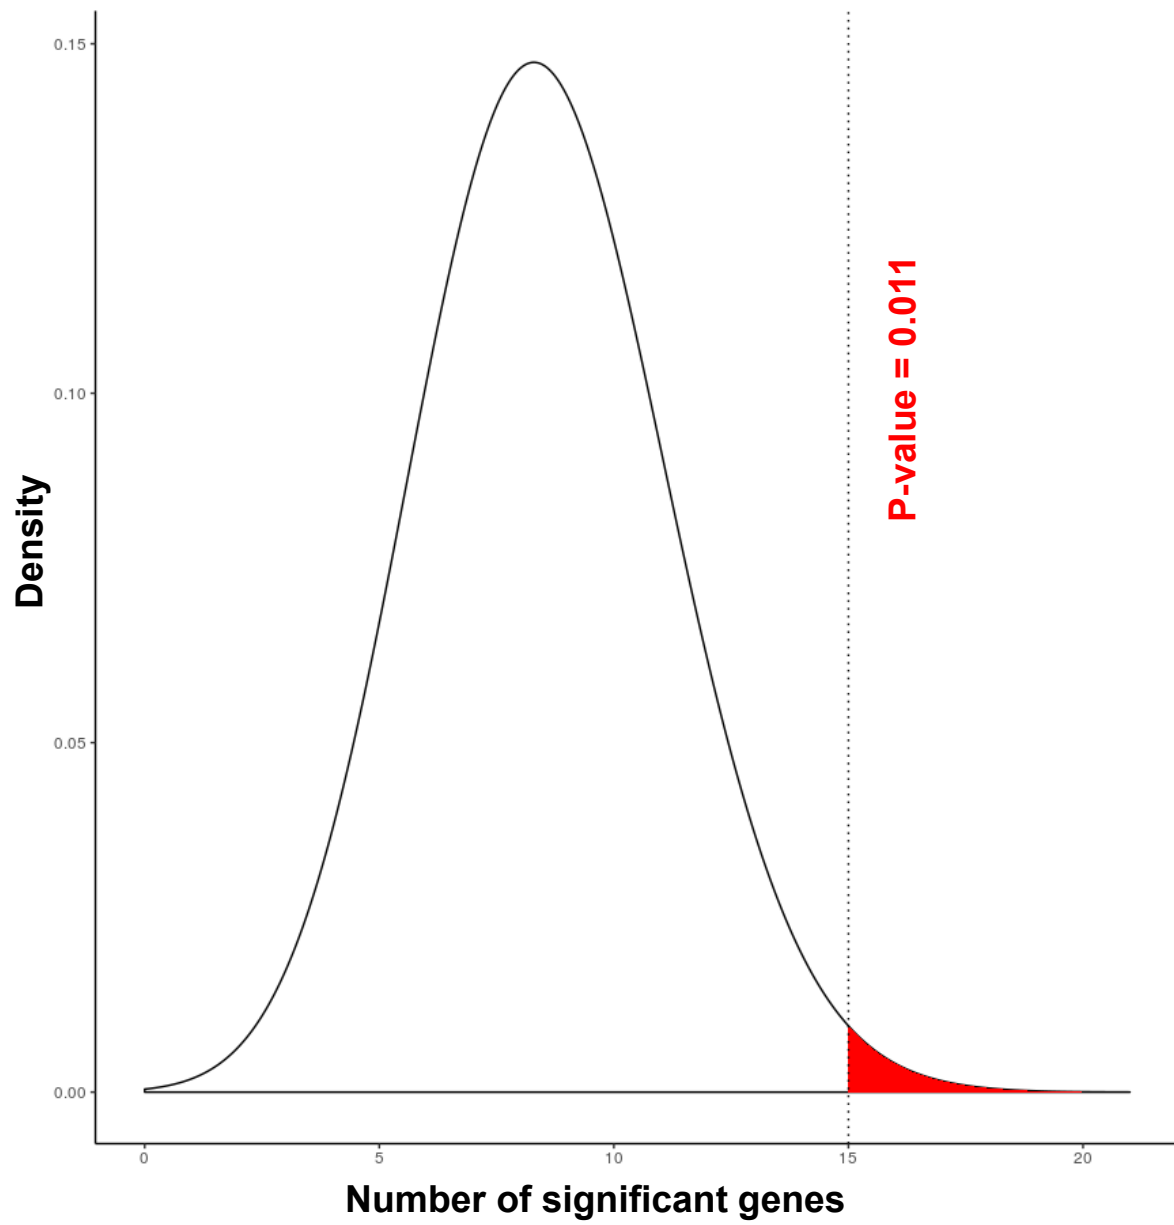

Supplement: 41386_2019_471_MOESM1_ESM.pdf [file 41386_2019_471_MOESM1_ESM.pdf]
